# Supplementary material
Source: PubMed Central journal article supplement (PMC3486056)
Supplement: IAI.00386-12_zii999099880so1.pdf [file IAI.00386-12_zii999099880so1.pdf]

1  
2  
3 **Supplementary files to the manuscript “The global effect of IL-10 on the**  
4 **transcriptional profile induced by *N. meningitidis* in human monocytes” by**

5 **Unni Gopinathan and colleagues**

6 **Tables**

7

| <b>Table S1. Genes up-regulated by <i>N. meningitidis</i> which were down-regulated by interleukin-10<sup>a</sup></b> |                    |                                            |                                  |                                          |                                     |                                     |
|-----------------------------------------------------------------------------------------------------------------------|--------------------|--------------------------------------------|----------------------------------|------------------------------------------|-------------------------------------|-------------------------------------|
| <b>Probe Set ID</b>                                                                                                   | <b>Gene Symbol</b> | <b>Molecular function<sup>b</sup></b>      | <b>Fold change</b>               |                                          |                                     |                                     |
|                                                                                                                       |                    |                                            | <b>Nm vs control<sup>c</sup></b> | <b>Nm + IL-10 vs control<sup>c</sup></b> | <b>IL-10 vs control<sup>c</sup></b> | <b>Nm + IL-10 vs Nm<sup>d</sup></b> |
| 8083690                                                                                                               | IL12A              | Cytokine activity                          | 13.0                             | 2.0                                      | -1.2                                | -6.5                                |
| 7917875                                                                                                               | F3                 | Phospholipid binding                       | 7.1                              | 1.6                                      | -2.2                                | -4.4                                |
| 8101131                                                                                                               | CXCL11             | Chemokine activity                         | 23.6                             | 5.5                                      | -2.2                                | -4.3                                |
| 8109649                                                                                                               | MIR146A            | Post-transcriptional regulation            | 2.4                              | -1.6                                     | -1.9                                | -3.9                                |
| 8116921                                                                                                               | EDN1               | Patterning of blood vessels                | 14.7                             | 3.8                                      | -1.8                                | -3.9                                |
| 8107887                                                                                                               | CSF2               | Immune response                            | 3.3                              | -1.0                                     | -1.3                                | -3.5                                |
| 7972217                                                                                                               | SPRY2              | Cell-cell signaling                        | 3.5                              | 1.1                                      | -2.9                                | -3.1                                |
| 8179263                                                                                                               | TNF                | Cytokine activity                          | 6.2                              | 2.0                                      | -2.3                                | -3.0                                |
| 8054712                                                                                                               | IL1A               | Cytokine activity                          | 2.2                              | -1.4                                     | -4.0                                | -3.0                                |
| 8116992                                                                                                               | EST                | N/A                                        | 2.9                              | -1.0                                     | 1.0                                 | -3.0                                |
| 7930299                                                                                                               | C10orf78           | Protein binding                            | 6.7                              | 2.3                                      | -1.2                                | -3.0                                |
| 7956251                                                                                                               | IL23A              | Cytokine activity                          | 4.4                              | 1.5                                      | -1.0                                | -2.9                                |
| 8172268                                                                                                               | MIR222             | Post-transcriptional regulation            | 3.2                              | 1.1                                      | -1.8                                | -2.9                                |
| 8138542                                                                                                               | IL6                | Cytokine activity                          | 6.4                              | 2.2                                      | -1.1                                | -2.9                                |
| 8172266                                                                                                               | MIR221             | Post-transcriptional regulation            | 2.0                              | -1.4                                     | -2.4                                | -2.8                                |
| 8100984                                                                                                               | CXCL3              | Chemokine activity                         | 2.1                              | -1.3                                     | -2.8                                | -2.8                                |
| 7964787                                                                                                               | IFNG               | Cytokine activity                          | 16.9                             | 6.5                                      | 1.7                                 | -2.6                                |
| 8147206                                                                                                               | RIPK2              | CARD domain binding                        | 3.7                              | 1.4                                      | -2.4                                | -2.6                                |
| 8105828                                                                                                               | CCNB1              | Histone kinase activity                    | 6.9                              | 2.7                                      | -1.1                                | -2.5                                |
| 8100994                                                                                                               | CXCL2              | Chemokine activity                         | 2.9                              | 1.1                                      | -2.7                                | -2.5                                |
| 8096301                                                                                                               | SPP1               | Extracellular matrix binding               | 1.9                              | -1.4                                     | -1.3                                | -2.5                                |
| 8120967                                                                                                               | NT5E               | 5'-nucleotidase activity                   | 3.4                              | 1.4                                      | 1.1                                 | -2.5                                |
| 8044541                                                                                                               | IL1F9              | Interleukin-1 receptor antagonist activity | 9.6                              | 3.8                                      | -2.0                                | -2.5                                |

|         |          |                                            |      |      |      |      |
|---------|----------|--------------------------------------------|------|------|------|------|
| 7954434 | EST      | N/A                                        | 4.5  | 1.9  | 1.1  | -2.4 |
| 7932985 | NRP1     | Co-receptor activity                       | 1.9  | -1.2 | -2.0 | -2.4 |
| 8097098 | USP53    | Ubiquitin thiolesterase activity           | 2.0  | -1.2 | -1.2 | -2.4 |
| 7951259 | MMP10    | Calcium ion binding                        | 11.8 | 5.0  | -1.3 | -2.4 |
| 8047125 | EST      | N/A                                        | 4.2  | 1.8  | 1.1  | -2.4 |
| 8180376 | EST      | N/A                                        | 3.3  | 1.5  | -1.7 | -2.3 |
| 7953878 | CLEC2D   | Transmembrane signaling receptor activity  | 4.4  | 1.9  | 1.2  | -2.3 |
| 8151816 | GEM      | Calmodulin binding                         | 3.3  | 1.5  | -1.7 | -2.2 |
| 7908388 | RGS1     | Calmodulin binding                         | 3.0  | 1.4  | -1.2 | -2.2 |
| 8143471 | CLEC5A   | Protein binding                            | 1.5  | -1.4 | -2.7 | -2.2 |
| 8172270 | EST      | N/A                                        | 1.9  | -1.2 | -1.7 | -2.2 |
| 8050503 | TTC32    | Protein binding                            | 2.0  | -1.1 | -1.1 | -2.1 |
| 8129937 | CITED2   | Chromatin binding                          | 2.3  | 1.1  | -1.5 | -2.1 |
| 8092390 | EST      | N/A                                        | 2.0  | -1.0 | -1.1 | -2.1 |
| 7957271 | EST      | N/A                                        | 1.9  | -1.1 | -1.3 | -2.1 |
| 7994161 | RBBP6    | Ligase activity                            | 3.1  | 1.5  | -1.1 | -2.1 |
| 8130539 | TAGAP    | Guanyl-nucleotide exchange factor activity | 4.9  | 2.3  | -1.3 | -2.1 |
| 8098261 | EST      | N/A                                        | 2.5  | 1.2  | -1.1 | -2.1 |
| 7917514 | EST      | N/A                                        | 5.3  | 2.6  | 1.0  | -2.0 |
| 7912157 | ERRFI1   | Protein kinase binding                     | 2.1  | 1.0  | -1.7 | -2.0 |
| 8156848 | NR4A3    | Nucleic acid binding                       | 3.3  | 1.6  | -1.2 | -2.0 |
| 8081488 | HHLA2    | N/A                                        | 1.9  | -1.1 | -1.6 | -2.0 |
| 8141016 | TFPI2    | Peptidase inhibitor activity               | 5.2  | 2.6  | -1.6 | -2.0 |
| 8048723 | EST      | N/A                                        | 2.0  | -1.0 | -1.1 | -2.0 |
| 7919556 | EST      | N/A                                        | 3.3  | 1.7  | -1.3 | -1.9 |
| 7951271 | MMP1     | Calcium ion binding                        | 7.9  | 4.1  | -1.4 | -1.9 |
| 7919560 | EST      | N/A                                        | 3.3  | 1.7  | -1.3 | -1.9 |
| 8112668 | GCNT4    | Acetylglucosaminyltransferase activity     | 7.5  | 3.9  | -1.0 | -1.9 |
| 8105267 | ITGA2    | Cell adhesion molecule binding             | 2.8  | 1.4  | 1.1  | -1.9 |
| 8004694 | CYB5D1   | Heme binding                               | 2.4  | 1.3  | 1.1  | -1.9 |
| 7931832 | AKR1C2   | Aldo-keto reductase (NADP) activity        | 3.0  | 1.6  | 1.1  | -1.9 |
| 7932862 | EST      | N/A                                        | 2.2  | 1.2  | -1.1 | -1.9 |
| 7911178 | NLRP3    | Nucleotide binding                         | 3.5  | 1.8  | -1.7 | -1.9 |
| 7902495 | NEXN     | Actin binding                              | 3.8  | 2.0  | -1.1 | -1.9 |
| 7983922 | EST      | N/A                                        | 2.7  | 1.4  | -1.0 | -1.9 |
| 8045695 | EST      | N/A                                        | 3.8  | 2.1  | -1.1 | -1.9 |
| 7972867 | PCID2    | Transcription regulator                    | 1.5  | -1.2 | -1.8 | -1.9 |
| 8021376 | NEDD4L   | Acid-amino acid ligase activity            | 3.0  | 1.6  | -1.5 | -1.9 |
| 7981427 | CKB      | ATP binding                                | 2.2  | 1.2  | -1.3 | -1.8 |
| 7965249 | C12orf50 | N/A                                        | 4.1  | 2.2  | -1.2 | -1.8 |
| 8136662 | MGAM     | Alpha-glucosidase activity                 | 7.8  | 4.3  | -1.6 | -1.8 |
| 8004691 | TMEM88   | N/A                                        | 1.6  | -1.2 | -1.1 | -1.8 |
| 7899502 | RNU11    | N/A                                        | 2.3  | 1.3  | -1.1 | -1.8 |
| 8139207 | INHBA    | Cytokine activity                          | 15.0 | 8.3  | -1.1 | -1.8 |

|         |            |                                                       |      |      |      |      |
|---------|------------|-------------------------------------------------------|------|------|------|------|
| 8017964 | ABCA6      | ATPase activity                                       | 2.8  | 1.6  | -1.1 | -1.8 |
| 8017096 | EST        | N/A                                                   | 4.0  | 2.3  | -1.1 | -1.8 |
| 8041447 | CRIM1      | Enzyme inhibitor activity                             | 1.7  | -1.0 | -1.4 | -1.8 |
| 8006999 | CSF3       | Cytokine activity                                     | 3.7  | 2.1  | -1.1 | -1.8 |
| 8178435 | IER3       | Protein binding                                       | 1.5  | -1.2 | -1.2 | -1.7 |
| 7965094 | E2F7       | Nucleic acid binding                                  | 2.9  | 1.7  | 1.0  | -1.7 |
| 8096032 | PRDM8      | Nucleic acid binding                                  | 4.1  | 2.4  | 1.2  | -1.7 |
| 7976065 | EST        | N/A                                                   | 2.0  | 1.2  | -1.1 | -1.7 |
| 8013987 | EST        | N/A                                                   | 1.9  | 1.1  | 1.2  | -1.7 |
| 7926821 | MASTL      | ATP binding                                           | 5.4  | 3.2  | -1.1 | -1.7 |
| 7964736 | HMGA2      | 5'-deoxyribose-5-phosphate lyase activity             | 1.8  | 1.1  | -1.0 | -1.7 |
| 7933008 | EST        | N/A                                                   | 1.6  | -1.1 | -1.2 | -1.7 |
| 7903786 | CSF1       | Macrophage colony-stimulating factor receptor binding | 1.8  | 1.1  | -1.4 | -1.7 |
| 8101118 | CXCL9      | chemokine activity                                    | 3.9  | 2.3  | -1.0 | -1.7 |
| 8017098 | EST        | N/A                                                   | 3.4  | 2.0  | -1.2 | -1.7 |
| 7961371 | DUSP16     | Hydrolase activity                                    | 1.7  | 1.0  | -1.3 | -1.7 |
| 8048717 | SGPP2      | Catalytic activity                                    | 1.9  | 1.1  | -2.2 | -1.7 |
| 7925480 | FH         | Catalytic activity                                    | 1.8  | 1.1  | -1.6 | -1.7 |
| 8120431 | PTP4A1     | Hydrolase activity                                    | 1.9  | 1.2  | -1.3 | -1.7 |
| 8023598 | RNF152     | Ligase activity                                       | 1.8  | 1.1  | -1.1 | -1.7 |
| 7922523 | LOC730167  | N/A                                                   | 2.1  | 1.3  | -1.2 | -1.6 |
| 8071134 | C22orf37   | N/A                                                   | 1.8  | 1.1  | -1.1 | -1.6 |
| 8048761 | EST        | N/A                                                   | 2.7  | 1.6  | 1.0  | -1.6 |
| 8147746 | EST        | N/A                                                   | 11.3 | 6.9  | -1.1 | -1.6 |
| 8084206 | B3GNT5     | Galactosyltransferase activity                        | 1.9  | 1.2  | -1.5 | -1.6 |
| 8057990 | ANKRD44    | Protein binding                                       | 1.6  | 1.0  | -1.0 | -1.6 |
| 8094169 | CPEB2      | Nucleic acid binding                                  | 2.0  | 1.2  | -1.6 | -1.6 |
| 7970441 | GJB2       | Gap junction channel activity                         | 2.2  | 1.4  | -1.2 | -1.6 |
| 8021645 | SERPINB10  | Peptidase inhibitor activity                          | 1.9  | 1.2  | 1.0  | -1.6 |
| 7931281 | FANK1      | Transcription regulator                               | 2.1  | 1.3  | -1.2 | -1.6 |
| 8105300 | EST        | N/A                                                   | 2.4  | 1.5  | 1.1  | -1.6 |
| 7985257 | EST        | N/A                                                   | 2.3  | 1.5  | 1.1  | -1.6 |
| 8113358 | ST8SIA4    | Sialic acid binding                                   | 2.3  | 1.4  | -1.3 | -1.6 |
| 8057898 | HECW2      | Acid-amino acid ligase activity                       | 2.5  | 1.6  | 1.0  | -1.6 |
| 8069612 | NCRNA00158 | N/A                                                   | 2.3  | 1.4  | 1.0  | -1.6 |
| 7918457 | KCNA3      | Ion channel activity                                  | 1.8  | 1.1  | 1.1  | -1.6 |
| 8162276 | NFIL3      | Nucleic acid binding                                  | 1.8  | 1.1  | -1.2 | -1.6 |
| 7991283 | RHCG       | Ammonia transmembrane transporter activity            | 3.3  | 2.1  | -1.1 | -1.6 |
| 8068361 | SLC5A3     | Myo-inositol:sodium symporter activity;               | 4.0  | 2.6  | -1.1 | -1.6 |
| 7929012 | STAMBPL1   | Hydrolase activity                                    | 3.2  | 2.0  | 1.2  | -1.6 |
| 8015796 | EST        | N/A                                                   | 2.7  | 1.7  | -1.1 | -1.6 |
| 7951977 | FXYD6      | Ion channel activity                                  | 2.2  | 1.4  | -1.7 | -1.6 |
| 8047272 | SPATS2L    | N/A                                                   | 1.8  | 1.2  | -1.4 | -1.6 |
| 8123232 | SLC22A1    | Transmembrane                                         | 8.4  | 5.4  | -1.2 | -1.6 |

|         |          |                                      |     |     |      |      |
|---------|----------|--------------------------------------|-----|-----|------|------|
|         |          | transporter activity                 |     |     |      |      |
| 7902104 | PDE4B    | Hydrolase activity                   | 1.8 | 1.2 | -1.2 | -1.6 |
| 8023043 | PSTPIP2  | Actin binding                        | 2.3 | 1.5 | -1.3 | -1.6 |
| 8081405 | EST      | N/A                                  | 1.9 | 1.2 | -1.0 | -1.6 |
| 8057416 | EST      | N/A                                  | 1.7 | 1.1 | -1.0 | -1.6 |
| 8069565 | BTG3     | Protein binding                      | 1.8 | 1.2 | -1.7 | -1.5 |
| 7951413 | CARD17   | Cysteine-type endopeptidase activity | 2.6 | 1.7 | -1.2 | -1.5 |
| 8120061 | ENPP4    | Catalytic activity                   | 1.7 | 1.1 | -1.1 | -1.5 |
| 8113759 | EST      | N/A                                  | 1.6 | 1.1 | -1.2 | -1.5 |
| 7911049 | C1orf100 | N/A                                  | 1.7 | 1.1 | -1.1 | -1.5 |
| 8023059 | EST      | N/A                                  | 2.0 | 1.3 | -1.2 | -1.5 |
| 8052669 | SERTAD2  | Transcription coactivator activity   | 1.6 | 1.1 | -1.2 | -1.5 |
| 8169995 | FAM122C  | N/A                                  | 2.0 | 1.3 | -1.0 | -1.5 |
| 8068353 | MRPS6    | rRNA binding                         | 3.2 | 2.1 | -1.2 | -1.5 |
| 8114964 | SPINK1   | Endopeptidase inhibitor activity     | 4.1 | 2.7 | -1.0 | -1.5 |

1 **Table S1 legend**

2 <sup>a</sup>Listed according to the column “Nm + IL-10 vs Nm”.

3 <sup>b</sup>Molecular function was identified by searching gene ontology annotations in the Ingenuity Knowledge

4 Base. N/A denotes that annotations were not available. EST denotes expressed sequence tags, which are

5 partially sequenced cDNA fragments that may represent gene transcripts.

6 <sup>c</sup>The presented FCs are in comparison to unstimulated monocytes.

7 <sup>d</sup>The presented FCs are in comparison to monocytes stimulated by *N. meningitidis*.

| Probe Set ID | Gene Symbol | Molecular function <sup>b</sup>            | Fold change               |                                    |                               |                               |
|--------------|-------------|--------------------------------------------|---------------------------|------------------------------------|-------------------------------|-------------------------------|
|              |             |                                            | Nm vs contro <sup>c</sup> | Nm + IL-10 vs control <sup>c</sup> | IL-10 vs control <sup>c</sup> | Nm + IL-10 vs Nm <sup>d</sup> |
| 8030860      | FPR2        | G-protein coupled receptor activity        | -3,6                      | 2,4                                | 2,6                           | 8,8                           |
| 8022393      | PTPN2       | Nucleic acid binding                       | -1,6                      | 3,2                                | 3,4                           | 5,2                           |
| 7946559      | GNG10       | GTPase activity                            | -1,9                      | 2,6                                | 2,5                           | 5,0                           |
| 7960794      | CD163       | Scavenger receptor activity                | -1,5                      | 3,0                                | 3,6                           | 4,6                           |
| 8140840      | STEAP4      | Electron carrier activity                  | -1,9                      | 2,3                                | 1,8                           | 4,4                           |
| 8038899      | FPR1        | G-protein coupled receptor activity        | -2,0                      | 2,1                                | 2,4                           | 4,2                           |
| 7975799      | FLVCR2      | Heme binding                               | -2,1                      | 1,8                                | 2,0                           | 3,8                           |
| 8068266      | IFNAR1      | Interferon receptor activity               | -2,0                      | 1,9                                | 1,7                           | 3,8                           |
| 8099834      | TLR1        | Lipopeptide binding                        | -2,7                      | 1,4                                | 3,2                           | 3,7                           |
| 8025076      | VAV1        | Guanyl-nucleotide exchange factor activity | -2,1                      | 1,7                                | 2,1                           | 3,6                           |

|         |          |                                           |      |      |      |     |
|---------|----------|-------------------------------------------|------|------|------|-----|
| 7986092 | FURIN    | Endopeptidase activity                    | -2,5 | 1,4  | 1,7  | 3,5 |
| 8061668 | HCK      | ATP binding; kinase activity              | -1,9 | 1,8  | 1,6  | 3,4 |
| 7971486 | C13orf18 | N/A                                       | -1,7 | 2,0  | 1,8  | 3,4 |
| 8017212 | USP32    | Calcium ion binding                       | -1,6 | 2,0  | 2,6  | 3,2 |
| 8030782 | SIGLEC9  | Monosaccharide binding                    | -3,9 | -1,2 | 1,1  | 3,2 |
| 8031223 | LILRB1   | MHC class I receptor activity             | -2,4 | 1,3  | 1,8  | 3,1 |
| 8121515 | SLC16A10 | Amino acid transport activity             | -2,1 | 1,5  | 4,8  | 3,1 |
| 7938370 | SWAP70   | ATP binding                               | -2,6 | 1,2  | 1,2  | 3,1 |
| 8031712 | ZNF805   | Nucleic acid binding                      | -2,9 | 1,1  | -1,0 | 3,1 |
| 8114612 | CD14     | Lipopolysaccharide binding                | -3,7 | -1,2 | 1,4  | 3,0 |
| 8099897 | UGDH     | Electron carrier activity                 | -1,6 | 1,8  | 1,7  | 3,0 |
| 8158123 | FPGS     | ATP binding                               | -1,6 | 1,8  | 1,3  | 2,9 |
| 8032839 | SEMA6B   | Semaphorin receptor binding               | -3,2 | -1,1 | 1,5  | 2,9 |
| 8139500 | TNS3     | Metal ion binding                         | -2,0 | 1,5  | 2,2  | 2,9 |
| 8084794 | IL1RAP   | Interleukin-1 receptor activity           | -1,7 | 1,7  | 2,5  | 2,8 |
| 7908097 | SMG7     | Protein phosphatase 2A binding            | -1,7 | 1,7  | 1,3  | 2,8 |
| 8154305 | SELT     | Selenium binding                          | -1,7 | 1,6  | 1,3  | 2,8 |
| 8157761 | NEK6     | ATP binding                               | -3,5 | -1,3 | 1,5  | 2,8 |
| 8039257 | LAIR1    | Protein binding                           | -3,2 | -1,2 | 1,1  | 2,7 |
| 8034873 | EMR2     | Calcium ion binding                       | -1,7 | 1,6  | 1,8  | 2,7 |
| 8065607 | PLAGL2   | Nucleic acid binding                      | -1,9 | 1,4  | 1,5  | 2,7 |
| 8031213 | LILRA1   | Transmembrane signaling receptor activity | -2,9 | -1,1 | 1,5  | 2,7 |
| 7962869 | DDX23    | ATP binding                               | -2,0 | 1,3  | 1,1  | 2,6 |
| 8035456 | LRRC25   | N/A                                       | -5,0 | -2,0 | 1,2  | 2,6 |
| 8060772 | CDS2     | Nucleotidyltransferase activity           | -1,6 | 1,6  | 1,6  | 2,6 |
| 7981111 | DICER1   | ATP-dependent helicase activity           | -1,8 | 1,4  | 1,7  | 2,5 |
| 7954527 | ARNTL2   | Nucleic acid binding                      | -1,7 | 1,5  | 1,7  | 2,5 |
| 8032909 | PLIN3    | Protein binding                           | -2,3 | 1,1  | 1,8  | 2,5 |
| 8070819 | PTTG1P   | Nuclear translocation activity            | -2,4 | 1,1  | 1,5  | 2,5 |
| 7955535 | ACVR1B   | Activin-activated receptor activity       | -1,7 | 1,5  | 1,5  | 2,5 |
| 8039236 | LILRA5   | Receptor activity                         | -1,7 | 1,4  | 1,8  | 2,5 |
| 8024111 | CNN2     | Actin binding                             | -1,8 | 1,4  | 1,6  | 2,5 |
| 7933659 | CSTF2T   | Nucleic acid binding                      | -1,7 | 1,5  | 1,2  | 2,4 |
| 7995448 | TMEM188  | N/A                                       | -2,4 | -1,0 | 1,4  | 2,4 |
| 8180196 | EST      | N/A                                       | -2,1 | 1,1  | 1,4  | 2,4 |
| 8039196 | LILRB3   | Transmembrane signaling receptor activity | -1,7 | 1,4  | 1,4  | 2,4 |
| 8144516 | ERI1     | 3'-5' exonuclease activity                | -1,7 | 1,3  | 2,0  | 2,3 |
| 8003903 | ARRB2    | G-protein coupled receptor binding        | -2,6 | -1,1 | 1,1  | 2,3 |
| 7953211 | C12orf5  | Catalytic activity                        | -3,1 | -1,3 | 1,1  | 2,3 |
| 8038885 | SIGLEC14 | Sugar binding                             | -1,6 | 1,5  | 1,4  | 2,3 |
| 7904086 | LRIG2    | EST                                       | -1,6 | 1,4  | -1,0 | 2,3 |
| 8024572 | GNA15    | G-protein coupled receptor binding        | -2,7 | -1,2 | 1,1  | 2,3 |
| 8025421 | MARCH2   | Ligase activity                           | -1,6 | 1,4  | 2,0  | 2,2 |

|         |           |                                                   |      |      |      |     |
|---------|-----------|---------------------------------------------------|------|------|------|-----|
| 8157270 | SLC31A1   | Copper ion transmembrane transporter activity     | -2,3 | -1,1 | 1,3  | 2,2 |
| 8039212 | LILRB2    | Cell adhesion molecule binding                    | -2,0 | 1,1  | 1,2  | 2,2 |
| 8149749 | TNFRSF10D | Transmembrane signaling receptor activity         | -1,6 | 1,4  | 1,6  | 2,2 |
| 8091432 | COMMD2    | Protein binding                                   | -2,5 | -1,1 | 1,1  | 2,2 |
| 7924760 | ITPKB     | ATP binding                                       | -1,5 | 1,4  | 1,5  | 2,2 |
| 8158112 | CDK9      | Cyclin-dependent protein kinase activity          | -2,0 | 1,1  | 1,2  | 2,2 |
| 8180405 | EST       | N/A                                               | -2,2 | -1,0 | 1,0  | 2,1 |
| 8169603 | LONRF3    | ATP-dependent peptidase activity                  | -2,0 | 1,1  | 1,5  | 2,1 |
| 8129590 | STX7      | SNAP receptor activity                            | -2,8 | -1,3 | 1,0  | 2,1 |
| 8029465 | BCL3      | Nucleic acid binding                              | -1,8 | 1,2  | 1,5  | 2,1 |
| 7904018 | CTTNBP2NL | Protein binding                                   | -2,2 | -1,1 | -1,0 | 2,1 |
| 8035477 | ELL       | Phosphatase binding                               | -1,5 | 1,4  | 1,2  | 2,1 |
| 7938777 | LDHA      | Catalytic activity                                | -1,7 | 1,2  | 1,4  | 2,1 |
| 8091120 | GK5       | ATP binding                                       | -1,7 | 1,2  | 2,1  | 2,1 |
| 8020919 | C18orf21  | N/A                                               | -2,1 | -1,0 | 1,1  | 2,0 |
| 8148694 | GRINA     | Cation channel activity                           | -1,6 | 1,3  | 1,4  | 2,0 |
| 8107691 | PHAX      | RNA binding                                       | -2,7 | -1,4 | -1,1 | 2,0 |
| 8025285 | C19orf59  | N/A                                               | -2,3 | -1,1 | 2,0  | 2,0 |
| 8122144 | SNORA33   | N/A                                               | -1,9 | 1,1  | -1,4 | 2,0 |
| 7960411 | C12orf4   | N/A                                               | -1,6 | 1,3  | 1,1  | 2,0 |
| 8037408 | KCNN4     | Calcium-activated potassium channel activity      | -1,7 | 1,2  | 1,0  | 2,0 |
| 8031207 | LILRA2    | Antigen binding                                   | -3,3 | -1,6 | 1,2  | 2,0 |
| 7964246 | SNORD59B  | N/A                                               | -2,5 | -1,2 | -1,1 | 2,0 |
| 7931216 | FAM175B   | Polyubiquitin binding                             | -1,8 | 1,1  | 1,0  | 2,0 |
| 7986350 | ARRDC4    | Signal transduction                               | -3,5 | -1,8 | 1,1  | 2,0 |
| 8052622 | LOC388955 | N/A                                               | -2,1 | -1,1 | 1,2  | 1,9 |
| 8015835 | DUSP3     | Hydrolase activity                                | -1,8 | 1,1  | 1,3  | 1,9 |
| 8160016 | RANBP6    | Protein transport                                 | -1,9 | 1,0  | 1,3  | 1,9 |
| 7906703 | NDUFS2    | Electron carrier activity                         | -2,0 | -1,1 | -1,0 | 1,9 |
| 8112967 | TMEM167A  | N/A                                               | -2,1 | -1,1 | 1,2  | 1,9 |
| 8017186 | HEATR6    | N/A                                               | -1,7 | 1,1  | -1,2 | 1,9 |
| 7976571 | C14orf129 | N/A                                               | -2,3 | -1,2 | 1,0  | 1,9 |
| 8050255 | NOL10     | N/A                                               | -1,9 | -1,0 | 1,1  | 1,9 |
| 8110318 | PRELID1   | N/A                                               | -1,9 | -1,0 | 1,3  | 1,9 |
| 7960518 | TNFRSF1A  | Tumor necrosis factor-activated receptor activity | -2,0 | -1,1 | 1,3  | 1,9 |
| 8113591 | PGGT1B    | Catalytic activity                                | -2,3 | -1,2 | 1,1  | 1,9 |
| 7928019 | HK1       | ATPase activity                                   | -1,5 | 1,2  | 1,3  | 1,9 |
| 8001651 | ZNF319    | Nucleic acid binding                              | -1,8 | 1,0  | 1,7  | 1,8 |
| 7930450 | EST       | N/A                                               | -1,9 | -1,0 | 1,2  | 1,8 |
| 8024228 | MIDN      | N/A                                               | -1,6 | 1,1  | 1,2  | 1,8 |
| 8155883 | OSTF1     | SH3 domain binding                                | -2,1 | -1,2 | 1,1  | 1,8 |
| 7900009 | EIF2C4    | Nucleic acid binding                              | -1,9 | -1,1 | 1,4  | 1,8 |
| 8032127 | C19orf22  | N/A                                               | -1,7 | 1,1  | 1,1  | 1,8 |
| 8180261 | EST       | N/A                                               | -1,6 | 1,1  | 1,2  | 1,8 |

|         |         |                                                                      |      |      |      |     |
|---------|---------|----------------------------------------------------------------------|------|------|------|-----|
| 8031690 | ZNF264  | Nucleic acid binding                                                 | -1,7 | 1,0  | 1,2  | 1,8 |
| 7928944 | PAPSS2  | Adenylylsulfate kinase activity                                      | -1,6 | 1,1  | 1,5  | 1,8 |
| 8010161 | SEPT9   | GTPase activity                                                      | -2,0 | -1,1 | 1,3  | 1,8 |
| 8081740 | ATP6V1A | ATP binding                                                          | -2,2 | -1,3 | 1,4  | 1,8 |
| 8020110 | RAB31   | GTPase activity                                                      | -2,0 | -1,1 | 1,4  | 1,8 |
| 8046346 | HAT1    | Histone acetyltransferase activity                                   | -1,6 | 1,1  | 1,3  | 1,8 |
| 8047228 | MOBK3   | Metal ion binding                                                    | -2,2 | -1,3 | 1,0  | 1,8 |
| 8179575 | TRIM27  | Nucleic acid binding                                                 | -1,7 | 1,0  | -1,0 | 1,8 |
| 8030978 | ZNF845  | Metal ion binding                                                    | -2,6 | -1,5 | -1,1 | 1,8 |
| 8011018 | CRK     | Protein phosphorylated amino acid binding                            | -1,6 | 1,1  | 1,1  | 1,8 |
| 7945803 | CARS    | Aminoacyl-tRNA ligase activity                                       | -1,9 | -1,1 | 1,2  | 1,7 |
| 8003962 | PLD2    | Catalytic activity                                                   | -1,7 | -1,0 | 1,4  | 1,7 |
| 8107578 | SRFBP1  | Transcription regulator                                              | -2,0 | -1,1 | -1,3 | 1,7 |
| 8011713 | CXCL16  | Chemokine activity                                                   | -2,5 | -1,4 | 1,3  | 1,7 |
| 8111772 | DAB2    | Protein C-terminus binding                                           | -3,3 | -1,9 | 1,6  | 1,7 |
| 8081953 | GTF2E1  | Metal ion binding                                                    | -1,9 | -1,1 | -1,1 | 1,7 |
| 7939329 | PDHX    | Transferase activity                                                 | -1,6 | 1,1  | -1,0 | 1,7 |
| 8051396 | NLRC4   | Protein homodimerization activity                                    | -2,4 | -1,4 | 1,0  | 1,7 |
| 7936091 | USMG5   | N/A                                                                  | -1,8 | -1,0 | -1,1 | 1,7 |
| 8007505 | DHX8    | ATP-dependent helicase activity                                      | -2,1 | -1,2 | 1,0  | 1,7 |
| 7943577 | RAB39   | GTP binding                                                          | -1,9 | -1,1 | 1,1  | 1,7 |
| 7995040 | BCKDK   | Protein serine/threonine kinase activity                             | -2,3 | -1,3 | -1,1 | 1,7 |
| 7952522 | PUS3    | Isomerase activity                                                   | -1,9 | -1,1 | -1,1 | 1,7 |
| 7954969 | IRAK4   | Protein serine/threonine kinase activity                             | -1,6 | 1,1  | 1,4  | 1,7 |
| 8146930 | TMEM70  | Mitochondrial proton-transporting ATP synthase complex assembly      | -1,6 | 1,1  | 1,1  | 1,7 |
| 8001496 | NUDT21  | Histone deacetylase binding                                          | -3,0 | -1,8 | -1,1 | 1,7 |
| 8053046 | DUSP11  | Phosphatase activity                                                 | -3,0 | -1,8 | -1,1 | 1,7 |
| 8149330 | CTSB    | Cysteine-type endopeptidase activity                                 | -1,7 | -1,0 | 1,5  | 1,7 |
| 7979906 | COX16   | N/A                                                                  | -2,0 | -1,2 | -1,3 | 1,7 |
| 8169617 | PGRMC1  | Heme binding                                                         | -1,6 | 1,1  | 1,3  | 1,7 |
| 8128123 | RRAGD   | GTP binding                                                          | -1,8 | -1,1 | 1,1  | 1,7 |
| 8136045 | IRF5    | Sequence-specific Nucleic acid binding transcription factor activity | -1,7 | -1,0 | 1,0  | 1,7 |
| 8045736 | FMNL2   | Rho GTPase binding                                                   | -1,6 | 1,0  | 1,2  | 1,7 |
| 8068254 | IL10RB  | Interleukin-10 receptor activity                                     | -1,8 | -1,1 | 1,1  | 1,7 |
| 7962783 | ASB8    | Transcription regulator                                              | -1,6 | 1,1  | 1,1  | 1,7 |
| 8116848 | PAK1IP1 | Signal transduction                                                  | -2,0 | -1,2 | -1,4 | 1,7 |
| 7990033 | TLE3    | Protein binding                                                      | -2,2 | -1,3 | -1,1 | 1,7 |
| 8052721 | PPP3R1  | Calcium-dependent protein serine/threonine phosphatase activity      | -1,7 | 1,0  | 1,1  | 1,7 |

|         |           |                                                             |      |      |      |     |
|---------|-----------|-------------------------------------------------------------|------|------|------|-----|
| 8014047 | C17orf42  | Crossover junction endodeoxyribonuclease activity           | -1,7 | 1,0  | 1,2  | 1,7 |
| 7989735 | CLPX      | ATP-dependent peptidase activity                            | -3,2 | -1,9 | -1,1 | 1,7 |
| 7984190 | TRIP4     | Ligand-dependent nuclear receptor binding                   | -1,8 | -1,1 | 1,0  | 1,7 |
| 8018352 | SLC25A19  | Deoxynucleotide transmembrane transporter activity          | -2,2 | -1,3 | 1,2  | 1,7 |
| 8051413 | FAM98A    | N/A                                                         | -2,6 | -1,6 | -1,6 | 1,7 |
| 8050695 | SF3B14    | Nucleic acid binding                                        | -1,5 | 1,1  | -1,0 | 1,7 |
| 8048835 | MFF       | N/A                                                         | -1,6 | 1,0  | 1,2  | 1,7 |
| 7977571 | OSGEP     | Metalloendopeptidase activity                               | -1,7 | -1,0 | 1,0  | 1,7 |
| 8088526 | THOC7     | RNA binding                                                 | -1,9 | -1,1 | -1,0 | 1,7 |
| 8079368 | EST       | N/A                                                         | -2,0 | -1,2 | -1,0 | 1,7 |
| 7929677 | PI4K2A    | 1-phosphatidylinositol 4-kinase activity                    | -2,8 | -1,7 | -1,3 | 1,7 |
| 7960730 | LPCAT3    | Transferase activity                                        | -1,9 | -1,2 | 1,2  | 1,7 |
| 8075423 | DUSP18    | Hydrolase activity                                          | -3,1 | -1,9 | 1,1  | 1,7 |
| 7923173 | MIR181B1  | Post-transcriptional regulation                             | -2,9 | -1,7 | 1,1  | 1,6 |
| 8001552 | CIAPIN1   | Protein binding                                             | -1,9 | -1,2 | -1,1 | 1,6 |
| 8063607 | RAB22A    | GTPase activity                                             | -1,6 | 1,0  | 1,1  | 1,6 |
| 8130765 | FAM103A1  | Protein binding                                             | -1,7 | -1,0 | 1,1  | 1,6 |
| 7951422 | KIAA1826  | N/A                                                         | -3,0 | -1,8 | -1,3 | 1,6 |
| 8121461 | CDC40     | Catalytic activity                                          | -1,8 | -1,1 | 1,2  | 1,6 |
| 8070269 | DSCR3     | Vacuolar transport                                          | -2,9 | -1,8 | -1,1 | 1,6 |
| 7916130 | KTI12     | ATP binding                                                 | -2,3 | -1,4 | -1,5 | 1,6 |
| 8159006 | SNORD36B  | N/A                                                         | -2,7 | -1,6 | -1,6 | 1,6 |
| 8036908 | SERTAD3   | Protein binding                                             | -2,8 | -1,7 | 1,3  | 1,6 |
| 8065353 | THBD      | Transmembrane signaling receptor activity                   | -3,9 | -2,4 | 1,3  | 1,6 |
| 8075089 | TFIP11    | Nucleic acid binding                                        | -1,7 | -1,1 | -1,1 | 1,6 |
| 8156263 | SPIN1     | Methylated histone residue binding                          | -2,4 | -1,5 | 1,3  | 1,6 |
| 7941243 | DPF2      | Nucleic acid binding                                        | -2,2 | -1,4 | -1,1 | 1,6 |
| 7936706 | C10orf119 | Chromatin binding                                           | -1,7 | -1,0 | -1,1 | 1,6 |
| 8055890 | STAM2     | Protein binding                                             | -1,8 | -1,1 | 1,0  | 1,6 |
| 8158714 | EXOSC2    | 3'-5'-exoribonuclease activity                              | -2,8 | -1,7 | -1,7 | 1,6 |
| 7915516 | MED8      | RNA polymerase II transcription cofactor activity           | -2,9 | -1,8 | -1,2 | 1,6 |
| 7943552 | AASDHPPT  | Holo-[acyl-carrier-protein] synthase activity               | -2,5 | -1,5 | -1,2 | 1,6 |
| 8049574 | UBE2F     | Acid-amino acid ligase activity                             | -2,4 | -1,5 | -1,0 | 1,6 |
| 8031815 | ZNF776    | Nucleic acid binding                                        | -1,7 | -1,1 | 1,1  | 1,6 |
| 8031784 | ZNF134    | Sequence-specific DNA binding transcription factor activity | -2,1 | -1,3 | -1,2 | 1,6 |
| 7921868 | FCGR3A    | IgG binding                                                 | -2,7 | -1,6 | 1,2  | 1,6 |
| 8003116 | HSDL1     | Cxidoreductase activity                                     | -1,5 | 1,1  | -1,1 | 1,6 |
| 8084947 | FBXO45    | Protein binding                                             | -2,5 | -1,5 | -1,4 | 1,6 |
| 8163999 | ZBTB6     | Nucleic acid binding                                        | -1,7 | -1,0 | -1,0 | 1,6 |



|         |          |                                                        |      |      |      |     |
|---------|----------|--------------------------------------------------------|------|------|------|-----|
| 7935746 | BLOC1S2  | Gamma-tubulin binding                                  | -2,1 | -1,3 | 1,0  | 1,6 |
| 8155192 | GLIPR2   | N/A                                                    | -2,4 | -1,5 | 1,0  | 1,6 |
| 8147864 | TTC35    | N/A                                                    | -1,8 | -1,1 | 1,1  | 1,6 |
| 8106784 | RASA1    | GTPase activator activity                              | -2,7 | -1,7 | -1,3 | 1,6 |
| 8009205 | DDX42    | ATP-dependent helicase activity                        | -2,5 | -1,5 | 1,1  | 1,6 |
| 7950644 | NDUFC2   | NADH dehydrogenase (ubiquinone) activity               | -2,0 | -1,2 | -1,0 | 1,6 |
| 7897620 | PGD      | Phosphogluconate 2-dehydrogenase activity              | -2,2 | -1,4 | 1,0  | 1,6 |
| 7950197 | ARAP1    | GTPase activator activity                              | -2,4 | -1,5 | -1,0 | 1,6 |
| 7985488 | FAM103A1 | RNA binding                                            | -1,7 | -1,1 | 1,1  | 1,6 |
| 7899377 | PPP1R8   | Protein phosphatase inhibitor activity                 | -2,1 | -1,3 | -1,2 | 1,6 |
| 8150175 | C8orf41  | N/A                                                    | -2,0 | -1,2 | -1,1 | 1,6 |
| 8135250 | PSMC2    | Nucleoside-triphosphatase activity                     | -2,4 | -1,5 | -1,1 | 1,6 |
| 7996012 | ARL2BP   | GTPase activator activity                              | -2,4 | -1,5 | -1,1 | 1,6 |
| 8096905 | AP1AR    | Protein transporter                                    | -1,6 | -1,0 | 1,1  | 1,6 |
| 7961865 | KRAS     | GTPase activity                                        | -1,7 | -1,1 | 1,2  | 1,6 |
| 7944375 | TRAPPC4  | Protein binding                                        | -2,2 | -1,4 | -1,1 | 1,6 |
| 8152863 | EST      | N/A                                                    | -2,4 | -1,5 | 1,2  | 1,6 |
| 8120428 | FKBP1A   | Isomerase activity                                     | -2,4 | -1,5 | -1,0 | 1,6 |
| 8140859 | MTERF    | Double-stranded DNA binding                            | -1,7 | -1,1 | 1,1  | 1,6 |
| 7945058 | FAM118B  | N/A                                                    | -1,7 | -1,1 | -1,1 | 1,6 |
| 8041257 | SLC30A6  | Cation transmembrane transporter activity              | -2,1 | -1,3 | 1,0  | 1,6 |
| 8124022 | DTNBP1   | Protein binding                                        | -1,5 | 1,0  | 1,2  | 1,6 |
| 8040639 | HADHB    | 3-hydroxyacyl-CoA dehydrogenase activity               | -1,7 | -1,1 | 1,1  | 1,6 |
| 8108603 | HARS2    | aminoacyl-tRNA ligase activity                         | -1,6 | -1,0 | 1,1  | 1,6 |
| 8151842 | KIAA1429 | RNA splicing                                           | -2,0 | -1,3 | 1,1  | 1,6 |
| 7956658 | SLC16A7  | Monocarboxylic acid transmembrane transporter activity | -1,7 | -1,1 | 1,8  | 1,6 |
| 8083630 | GFM1     | GTPase activity                                        | -1,9 | -1,2 | -1,1 | 1,6 |
| 7967473 | EIF2B1   | Enzyme regulator activity                              | -2,3 | -1,5 | -1,3 | 1,6 |
| 8011875 | DERL2    | Protein binding                                        | -1,8 | -1,2 | 1,1  | 1,6 |
| 7905355 | SCNM1    | Metal ion binding                                      | -1,9 | -1,2 | 1,0  | 1,6 |
| 8044793 | STEAP3   | Electron carrier activity                              | -1,7 | -1,1 | 1,1  | 1,6 |
| 8161242 | EXOSC3   | 3'-5'-exoribonuclease activity                         | -2,3 | -1,5 | -1,3 | 1,6 |
| 7909527 | EST      | N/A                                                    | -1,6 | -1,0 | 1,1  | 1,6 |
| 7914996 | MEAF6    | Protein binding                                        | -2,7 | -1,7 | -1,3 | 1,6 |
| 8071069 | IL17RA   | Interleukin-17 receptor activity                       | -2,0 | -1,3 | -1,1 | 1,6 |
| 7918955 | GDAP2    | N/A                                                    | -2,0 | -1,3 | -1,0 | 1,6 |
| 8108163 | C5orf24  | N/A                                                    | -2,7 | -1,7 | -1,2 | 1,6 |
| 7912198 | ENO1     | Protein homodimerization activity                      | -2,0 | -1,3 | -1,1 | 1,6 |
| 8058985 | RNF25    | Ubiquitin-protein ligase activity                      | -2,3 | -1,5 | -1,1 | 1,6 |
| 8019523 | WDR45L   | Phosphatidylinositol-3,5-bisphosphate binding          | -2,8 | -1,8 | -1,1 | 1,6 |

|         |          |                                                                      |      |      |      |     |
|---------|----------|----------------------------------------------------------------------|------|------|------|-----|
| 8055060 | WDR33    | Signal transduction                                                  | -2,4 | -1,6 | -1,1 | 1,6 |
| 7921873 | FCGR3A   | IgG binding                                                          | -2,5 | -1,6 | 1,1  | 1,6 |
| 7904364 | WDR3     | Signal transduction                                                  | -2,8 | -1,8 | -1,9 | 1,6 |
| 7979698 | ATP6V1D  | ATPase activity                                                      | -1,8 | -1,2 | 1,2  | 1,6 |
| 8011093 | SLC43A2  | L-amino acid transmembrane transporter activity                      | -3,9 | -2,5 | -1,1 | 1,6 |
| 7958147 | TDG      | Damaged DNA binding                                                  | -2,1 | -1,3 | -1,1 | 1,6 |
| 8097704 | TMEM184C | N/A                                                                  | -2,0 | -1,3 | -1,1 | 1,5 |
| 8054217 | TXNDC9   | Protein binding                                                      | -1,9 | -1,3 | 1,2  | 1,5 |
| 8064438 | NSFL1C   | ATPase binding                                                       | -1,8 | -1,2 | 1,1  | 1,5 |
| 7963577 | SPRYD3   | N/A                                                                  | -1,6 | -1,1 | -1,1 | 1,5 |
| 8067295 | SLMO2    | N/A                                                                  | -2,0 | -1,3 | -1,1 | 1,5 |
| 7925062 | SIPA1L2  | GTPase activator activity                                            | -1,7 | -1,1 | 1,1  | 1,5 |
| 8053036 | TPRKB    | Protein kinase binding                                               | -2,0 | -1,3 | -1,1 | 1,5 |
| 7972180 | RNF219   | Metal ion binding                                                    | -2,3 | -1,5 | -1,1 | 1,5 |
| 7954503 | MED21    | DNA-directed RNA polymerase activity                                 | -2,9 | -1,9 | -1,1 | 1,5 |
| 8090546 | CNBP     | Sequence-specific DNA binding transcription factor activity          | -2,4 | -1,6 | -1,1 | 1,5 |
| 7971967 | DIS3     | 3'-5'-exoribonuclease activity                                       | -1,6 | -1,0 | 1,1  | 1,5 |
| 7948898 | SNORD31  | N/A                                                                  | -2,3 | -1,5 | -1,3 | 1,5 |
| 8003627 | TIMM22   | Protein channel activity                                             | -1,9 | -1,2 | -1,1 | 1,5 |
| 8084345 | AP2M1    | Transporter activity                                                 | -2,2 | -1,5 | -1,1 | 1,5 |
| 7977693 | CHD8     | DNA helicase activity                                                | -2,2 | -1,4 | 1,0  | 1,5 |
| 7983469 | SPATA5L1 | Nucleoside-triphosphatase activity                                   | -1,6 | -1,0 | -1,0 | 1,5 |
| 8157947 | ZBTB34   | Nucleic acid binding                                                 | -1,8 | -1,2 | 1,1  | 1,5 |
| 7934513 | AP3M1    | Protein binding                                                      | -2,3 | -1,5 | -1,0 | 1,5 |
| 8079346 | SACM1L   | Phosphoric ester hydrolase activity                                  | -2,0 | -1,3 | 1,1  | 1,5 |
| 8031720 | ZNF543   | Nucleic acid binding                                                 | -1,5 | -1,0 | 1,0  | 1,5 |
| 7970347 | CDC16    | Protein binding                                                      | -2,1 | -1,4 | -1,1 | 1,5 |
| 7910539 | C1orf124 | Nucleic acid binding                                                 | -1,6 | -1,0 | 1,1  | 1,5 |
| 8163964 | PDCL     | Protein complex binding                                              | -1,7 | -1,1 | 1,0  | 1,5 |
| 8007976 | NPEPPS   | Aminopeptidase activity                                              | -1,9 | -1,3 | 1,1  | 1,5 |
| 7906128 | SLC25A44 | Transmembrane transporter                                            | -2,1 | -1,4 | 1,0  | 1,5 |
| 8110499 | RUFY1    | Protein transporter activity                                         | -1,6 | -1,1 | 1,1  | 1,5 |
| 8052925 | TEX261   | N/A                                                                  | -2,5 | -1,6 | -1,2 | 1,5 |
| 8042468 | ANXA4    | Calcium-dependent phospholipid binding                               | -1,8 | -1,2 | -1,3 | 1,5 |
| 7971550 | MED4     | Ligand-dependent nuclear receptor transcription coactivator activity | -1,6 | -1,0 | 1,0  | 1,5 |
| 8146544 | UBXN2B   | N/A                                                                  | -2,2 | -1,5 | 1,3  | 1,5 |
| 8124459 | ZNF322A  | Nucleic acid binding                                                 | -2,0 | -1,3 | -1,0 | 1,5 |
| 8112302 | C5orf43  | N/A                                                                  | -2,7 | -1,8 | -1,2 | 1,5 |
| 7953321 | LTBR     | Receptor activity                                                    | -1,8 | -1,2 | 1,2  | 1,5 |
| 7979732 | VTI1B    | Protein binding                                                      | -2,5 | -1,7 | -1,2 | 1,5 |
| 7991581 | CHSY1    | Transferase activity                                                 | -2,0 | -1,3 | 1,4  | 1,5 |
| 8083272 | GYG1     | Transferase activity                                                 | -1,8 | -1,2 | 1,1  | 1,5 |

|         |          |                                              |      |      |      |     |
|---------|----------|----------------------------------------------|------|------|------|-----|
| 8016088 | CCDC43   | N/A                                          | -1,9 | -1,3 | -1,1 | 1,5 |
| 7966738 | C12orf49 | N/A                                          | -2,1 | -1,4 | -1,1 | 1,5 |
| 8110920 | FASTKD3  | Protein kinase activity                      | -2,0 | -1,3 | -1,1 | 1,5 |
| 8164883 | SURF4    | Cytochrome-c oxidase activity                | -1,5 | -1,0 | 1,1  | 1,5 |
| 7920401 | SLC39A1  | Metal ion transmembrane transporter activity | -1,7 | -1,1 | 1,1  | 1,5 |
| 8026541 | FAM32A   | N/A                                          | -2,1 | -1,4 | -1,2 | 1,5 |
| 8005857 | TMEM199  | N/A                                          | -1,7 | -1,1 | -1,1 | 1,5 |
| 7964466 | DCTN2    | Protein binding                              | -2,0 | -1,3 | -1,1 | 1,5 |
| 8060379 | PSMF1    | Endopeptidase inhibitor activity             | -2,1 | -1,4 | -1,1 | 1,5 |
| 8164587 | TOR1A    | Nucleotide binding                           | -2,8 | -1,9 | -1,2 | 1,5 |
| 8013581 | IFT20    | Protein binding                              | -1,6 | -1,1 | 1,3  | 1,5 |
| 7994102 | DCTN5    | Transferase activity                         | -2,3 | -1,5 | -1,1 | 1,5 |
| 8106743 | VCAN     | Hyaluronic acid binding                      | -1,9 | -1,3 | 2,0  | 1,5 |
| 8142663 | NDUFA5   | NADH dehydrogenase (ubiquinone) activity     | -1,8 | -1,2 | 1,0  | 1,5 |

1 **Table S2 legend**

2  
3 <sup>a</sup>Listed according to the column "Nm + IL-10 vs Nm".

4 <sup>b</sup>Molecular function was identified by searching gene ontology annotations in the Ingenuity Knowledge

5 Base. N/A denotes that annotations were not available. EST denotes expressed sequence tags, which are  
6 partially sequenced cDNA fragments that may represent gene transcripts.

7 <sup>c</sup>The presented FCs are in comparison to unstimulated monocytes.

8 <sup>d</sup>The presented FCs are in comparison to monocytes stimulated by *N. meningitidis*.

9 **Table S3. Genes up-regulated in synergy by *N. meningitidis* and interleukin-10<sup>a</sup>**

| Probe Set ID | Gene Symbol | Molecular function <sup>c</sup>           | Fold change                |                                    |                               |
|--------------|-------------|-------------------------------------------|----------------------------|------------------------------------|-------------------------------|
|              |             |                                           | Nm vs control <sup>c</sup> | Nm + IL-10 vs control <sup>c</sup> | IL-10 vs control <sup>c</sup> |
| 7921652      | SLAMF1      | Transmembrane signaling receptor activity | 7.4                        | 54.5                               | 9.3                           |
| 8091411      | TM4SF1      | Signal transduction                       | 7.6                        | 28.7                               | 5.5                           |
| 7934898      | ANKRD22     | Transcription regulator                   | 4.6                        | 22.8                               | 3.3                           |
| 7921434      | AIM2        | Double-stranded Nucleic acid binding      | 9.9                        | 18.3                               | 2.5                           |
| 7931914      | IL2RA       | Interleukin-2 receptor activity           | 4.3                        | 16.5                               | 2.0                           |
| 8178115      | CFB         | Catalytic activity                        | 11.5                       | 16.5                               | 1.2                           |
| 7939314      | EHF         | Nucleic acid binding                      | 2.7                        | 11.8                               | 2.0                           |
| 8102594      | TNIP3       | N/A                                       | 3.4                        | 10.7                               | 7.0                           |
| 8107706      | LMNB1       | Phospholipase binding                     | 2.0                        | 10.6                               | 7.6                           |
| 8082673      | ACPP        | Acid phosphatase activity                 | 1.4                        | 9.9                                | 4.9                           |
| 7951385      | CASP5       | Cysteine-type endopeptidase activity      | 1.6                        | 9.6                                | 4.4                           |
| 8103508      | MARCH1      | Ligase activity                           | 1.0                        | 9.1                                | 6.8                           |
| 8163896      | STOM        | Protein homooligomerization               | 1.2                        | 8.5                                | 4.4                           |

|         |          |                                                                      |     |     |     |
|---------|----------|----------------------------------------------------------------------|-----|-----|-----|
| 8126839 | TNFRSF21 | Protein binding                                                      | 1.9 | 8.3 | 3.7 |
| 8094743 | RHOH     | GTPase inhibitor activity                                            | 3.2 | 8.2 | 1.5 |
| 8128939 | TRAF3IP2 | Protein binding                                                      | 4.5 | 7.2 | 2.1 |
| 8136115 | FAM40B   | N/A                                                                  | 1.6 | 6.9 | 3.9 |
| 7908351 | PLA2G4A  | Calcium-dependent phospholipid binding                               | 4.8 | 6.5 | 1.2 |
| 8124307 | CMAH     | Iron-sulfur cluster binding                                          | 3.6 | 6.3 | 1.7 |
| 8145317 | ADAMDEC1 | Metalloendopeptidase activity                                        | 2.9 | 6.2 | 1.7 |
| 8129627 | VNN3     | Pantetheine hydrolase activity                                       | 1.8 | 6.1 | 2.5 |
| 8083594 | PTX3     | (1->3)-beta-D-glucan binding                                         | 2.1 | 6.1 | 1.2 |
| 7953651 | PEX5     | Peroxisome targeting sequence binding                                | 1.0 | 5.4 | 2.4 |
| 7962884 | RND1     | GTPase activity                                                      | 1.6 | 5.0 | 1.3 |
| 8083569 | TIPARP   | Transferase activity                                                 | 2.4 | 5.0 | 1.5 |
| 8023688 | SERPINB4 | Peptidase inhibitor activity                                         | 1.7 | 4.9 | 1.3 |
| 7953749 | CLEC4D   | Sugar binding                                                        | 1.5 | 4.8 | 1.8 |
| 8097461 | CCRN4L   | Sequence-specific Nucleic acid binding transcription factor activity | 2.9 | 4.8 | 1.6 |
| 7998940 | MEFV     | Actin binding                                                        | 1.7 | 4.6 | 2.8 |
| 7993800 | LYRM1    | N/A                                                                  | 2.9 | 4.6 | 1.5 |
| 8072735 | APOL1    | Chloride channel activity                                            | 2.1 | 4.6 | 1.4 |
| 8056222 | DPP4     | Aminopeptidase activity                                              | 2.7 | 4.5 | 1.2 |
| 8109326 | C5orf62  | N/A                                                                  | 2.0 | 4.3 | 1.6 |
| 7908409 | RGS2     | GTPase activator activity                                            | 1.8 | 3.8 | 1.5 |
| 8103911 | IRF2     | Sequence-specific Nucleic acid binding transcription factor activity | 1.8 | 3.7 | 1.8 |
| 7999423 | SOCS1    | N/A                                                                  | 2.0 | 3.7 | 1.4 |
| 7985285 | ARNT2    | Protein heterodimerization activity                                  | 1.3 | 3.7 | 1.6 |
| 8000028 | DCUN1D3  | N/A                                                                  | 1.9 | 3.6 | 1.5 |
| 7928999 | LIPN     | Hydrolase activity                                                   | 2.2 | 3.4 | 1.2 |
| 7922162 | SLC19A2  | Folic acid transporter activity                                      | 1.3 | 3.4 | 1.3 |
| 8102839 | NDUFC1   | NADH dehydrogenase (ubiquinone) activity                             | 1.4 | 3.2 | 1.1 |
| 7900426 | SMAP2    | GTPase activator activity                                            | 1.1 | 3.2 | 2.1 |
| 8130939 | DLL1     | Calcium ion binding                                                  | 1.3 | 3.2 | 1.6 |
| 7924166 | BATF3    | Protein heterodimerization activity                                  | 1.2 | 3.1 | 1.5 |
| 7953243 | NDUFA9   | NADH dehydrogenase (ubiquinone) activity                             | 1.3 | 3.1 | 1.4 |
| 8171418 | PIGA     | Phosphatidylinositol N-acetylglucosaminyltransferase activity        | 1.7 | 3.0 | 1.2 |
| 8147766 | FZD6     | G-protein coupled receptor activity                                  | 1.8 | 2.9 | 1.1 |
| 8154721 | IFNK     | Interferon-alpha/beta receptor binding                               | 1.5 | 2.9 | 1.2 |
| 8025058 | TRIP10   | Identical protein binding                                            | 1.1 | 2.8 | 1.7 |
| 8040960 | GCKR     | Enzyme inhibitor activity                                            | 1.2 | 2.7 | 1.4 |
| 8042119 | PAPOLG   | Nucleotidyltransferase activity                                      | 1.0 | 2.6 | 1.2 |

|         |       |                        |     |     |     |
|---------|-------|------------------------|-----|-----|-----|
| 7980537 | STON2 | Protein binding        | 1.3 | 2.6 | 1.1 |
| 7899361 | STX12 | SNAP receptor activity | 1.0 | 2.4 | 1.3 |

1  
2 **Table S3 legend**  
3  
4 <sup>a</sup>Listed according to the column “Nm + IL-10 vs control”.  
5 <sup>b</sup>Molecular function was identified by searching gene ontology annotations in the Ingenuity Knowledge  
6 Base. N/A denotes that annotations were not available. EST denotes expressed sequence tags, which are  
7 partially sequenced cDNA fragments that may represent gene transcripts.  
8 <sup>c</sup>The presented FCs are in comparison to unstimulated monocytes.

9  
10  
11  
12  
13  
14  
15  
16  
17  
18  
19  
20  
21  
22



1  
2  
3  
4  
5

**Figure S2: Network 1 generated from the genes up-regulated by *N. meningitidis* and down-regulated by IL-10**

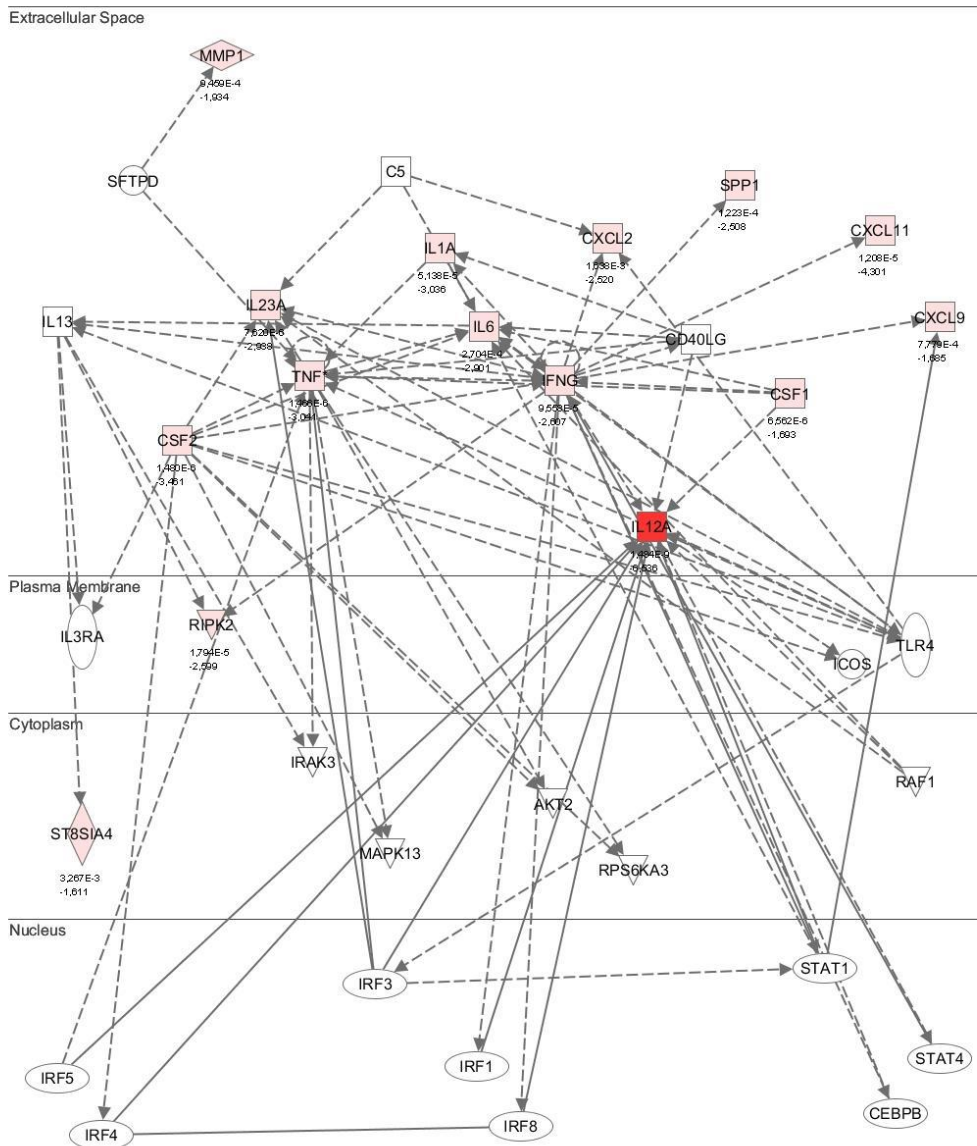

6 © 2000-2012 Ingenuity Systems, Inc. All rights reserved.

7 **Figure S2 legend**

1 Figure S2 displays network 1 from Table 3. The color red indicates that the gene has  
2 been down-regulated by IL-10, and the tone of the color indicates the extent to which the  
3 gene has been down-regulated. Ingenuity Pathway Analysis has located the genes to  
4 the nucleus, cytoplasm, plasma membrane and extracellular space. Solid lines imply  
5 direct relationships between the proteins encoded by the genes, while dashed lines  
6 represent indirect relationships.

7

8 **Figure S3: Network 2 generated from genes up-regulated by *N. meningitidis* and**  
9 **down-regulated by IL-10**



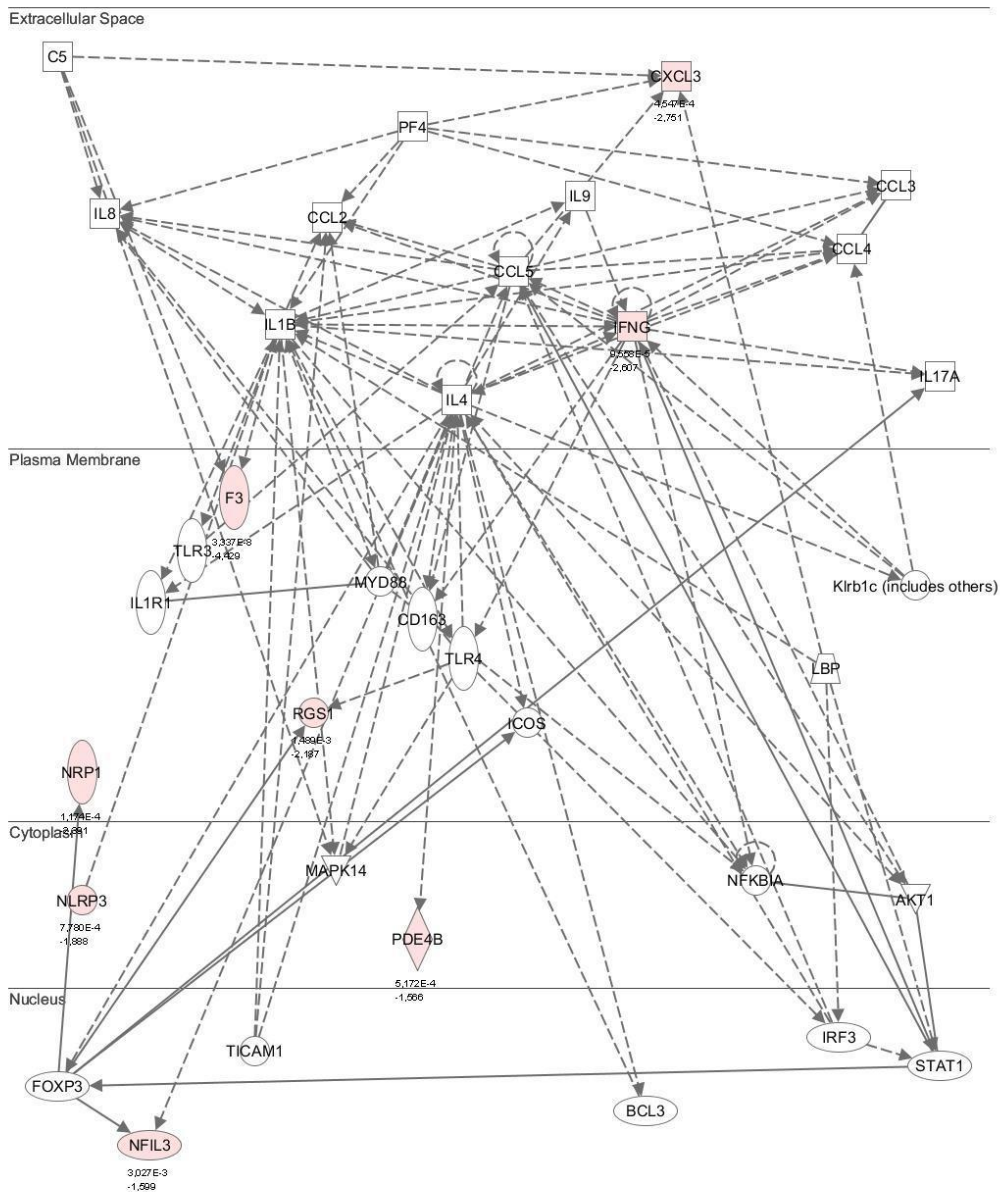

1 © 2000-2012 Ingenuity Systems, Inc. All rights reserved.

2 **Figure S3 legend**

3 Figure S3 displays network 2 from Table 3. The color red indicates that the gene has  
 4 been down-regulated by IL-10, and the tone of the color indicates the extent to which the  
 5 gene has been down-regulated. Ingenuity Pathway Analysis has located the genes to  
 6 the nucleus, cytoplasm, plasma membrane and extracellular space. Solid lines imply

1 direct relationships between the proteins encoded by the genes, while dashed lines  
 2 represent indirect relationships.

3

4 **Figure S4: Heatmap of genes down-regulated by *N. meningitidis* and up-regulated**  
 5 **by IL-10**

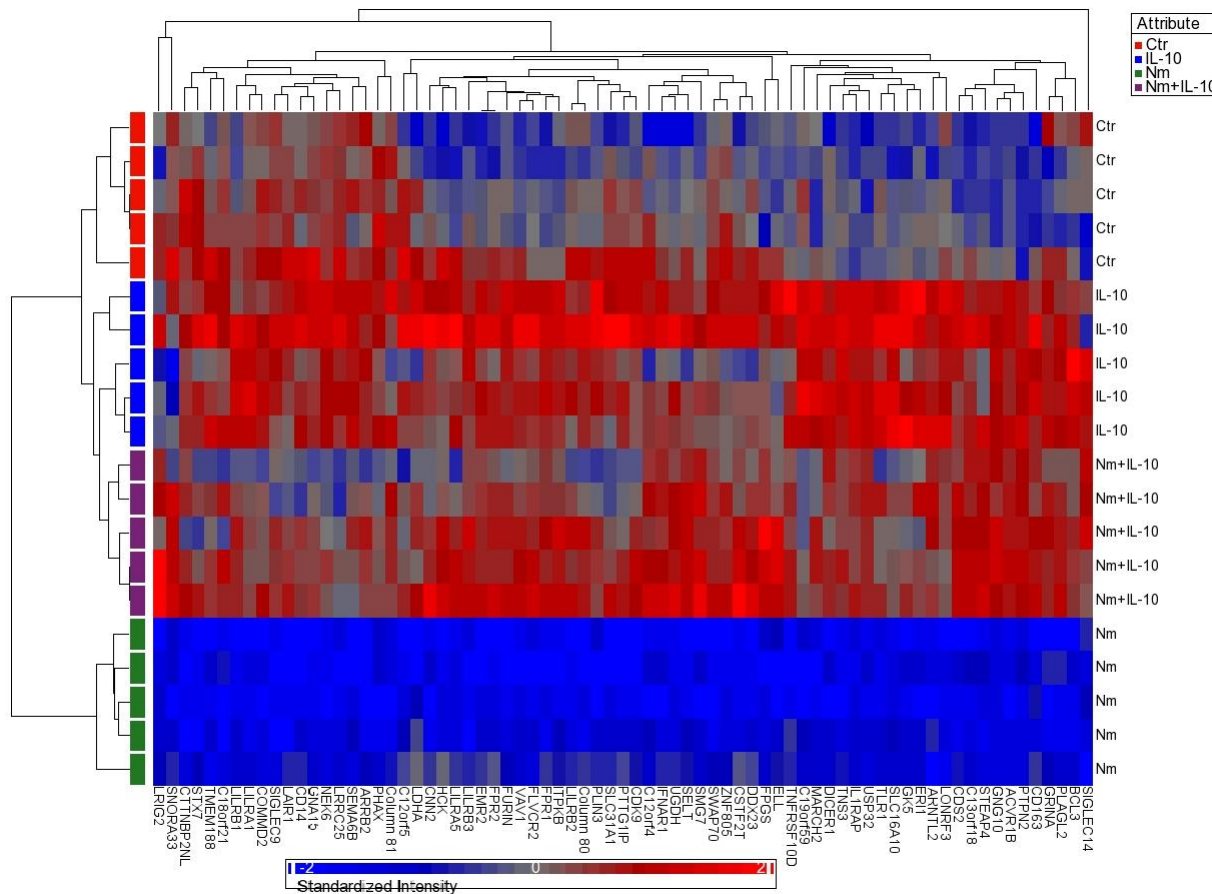

6

7 **Figure S4 legend**

8 The heatmap displays the expression of genes in unstimulated monocytes (Ctr) and  
 9 monocytes stimulated by IL-10 (IL-10) alone, *N. meningitidis* (Nm) alone and *N.*  
 10 *meningitidis* in combination with IL-10 (Nm + IL-10). The signal intensity for each gene  
 11 is compared to the average intensity detected for the gene over the 20 microarrays.  
 12 Grey color indicates that the signal intensity for the gene in the array is close to this

1 average signal intensity level. The color red indicates up-regulation and signal intensity  
 2 above the average level, while blue indicates down-regulation and signal intensity below  
 3 the average level.

4

5 **Figure S5: Network 1 generated from genes down-regulated by *N. meningitidis***  
 6 **and up-regulated by IL-10**

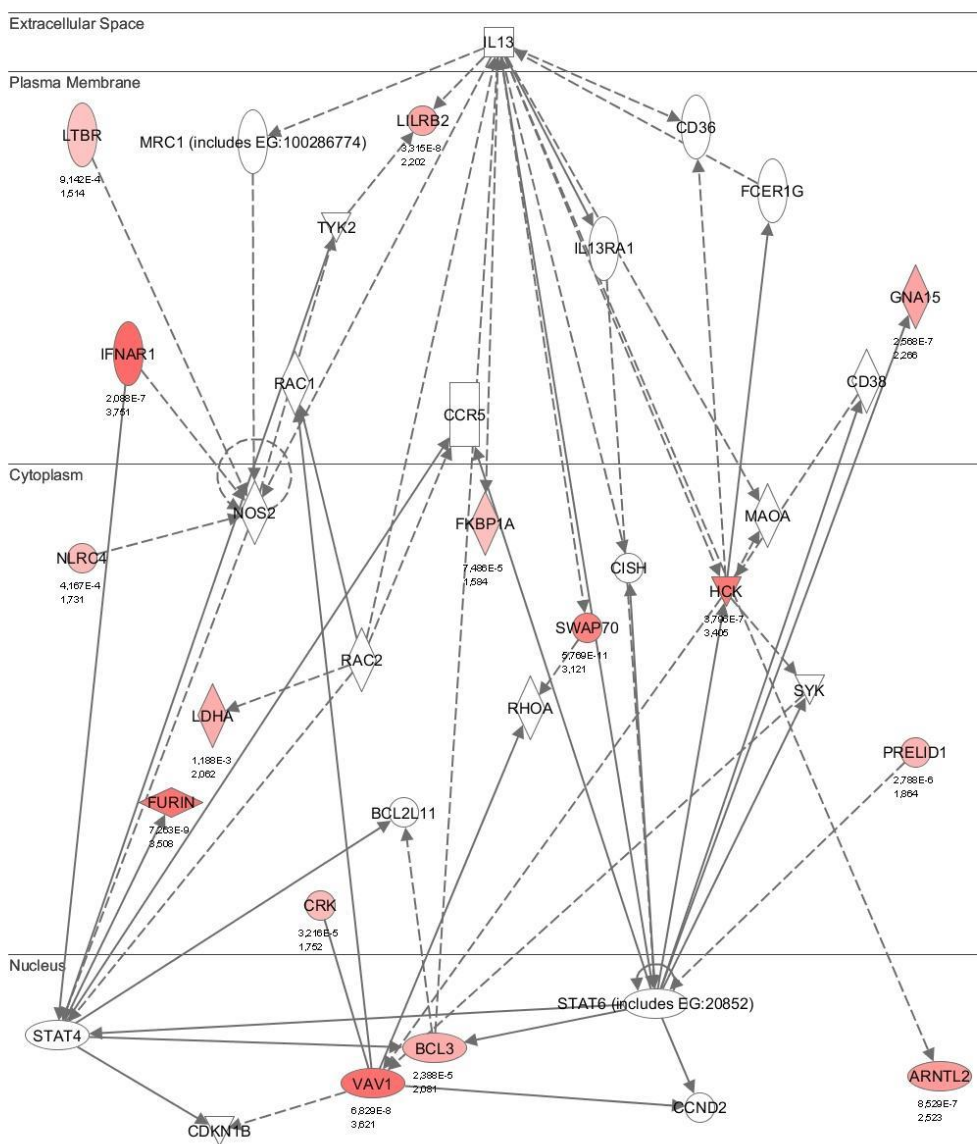

7

1 **Figure S5 legend**

2 Figure S5 displays network 1 from Table 4. The color red indicates that the gene has  
3 been up-regulated IL-10, and the tone of the color indicates the extent to which the gene  
4 has been up-regulated. Ingenuity Pathway Analysis has located the genes to the  
5 nucleus, cytoplasm, plasma membrane and extracellular space. Solid lines imply direct  
6 relationships between the proteins encoded by the genes, while dashed lines represent  
7 indirect relationships.

8

9

10

11

12

13

14

15

16

17

18

19

20

21

22

23

24

1 **Figure S6: Network 2 generated from genes down-regulated by *N. meningitidis***  
 2 **and up-regulated by IL-10**

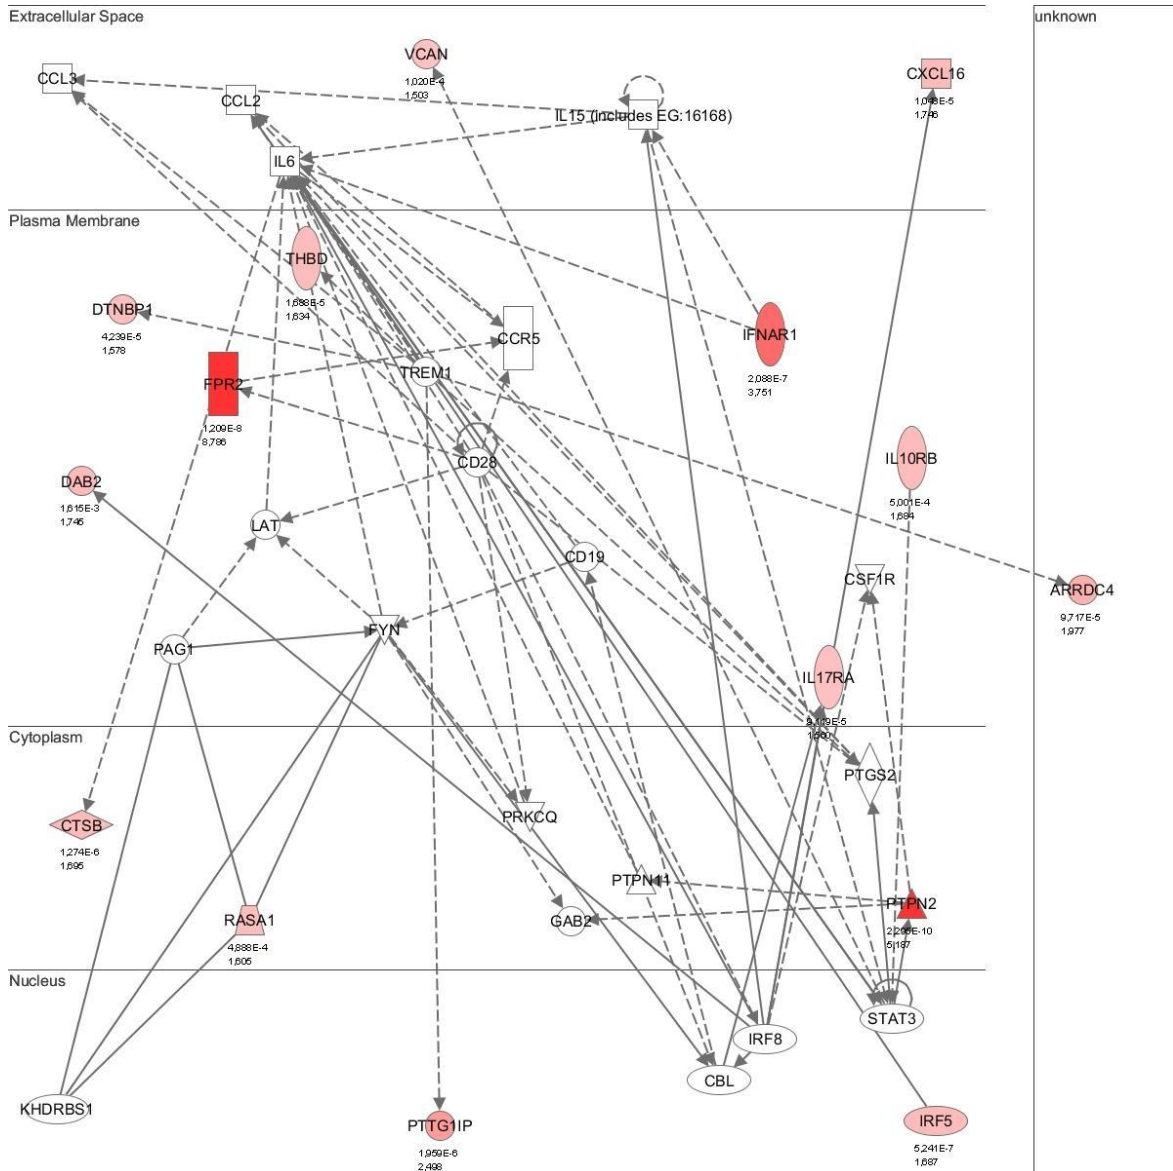

3 © 2000-2012 Ingenuity Systems, Inc. All rights reserved.

4 **Figure S6 legend**

5 Figure S6 displays network 2 from Table 4. The color red indicates that the gene has  
 6 been up-regulated by IL-10, and the tone of the color indicates the extent to which the  
 7 gene has been up-regulated. Ingenuity Pathway Analysis has located the genes to the

1 nucleus, cytoplasm, plasma membrane and extracellular space. Solid lines imply direct  
 2 relationships between the proteins encoded by the genes, while dashed lines represent  
 3 indirect relationships.

4

5 **Figure S7: Network 3 generated from genes down-regulated by *N. meningitidis***  
 6 **and up-regulated by IL-10**

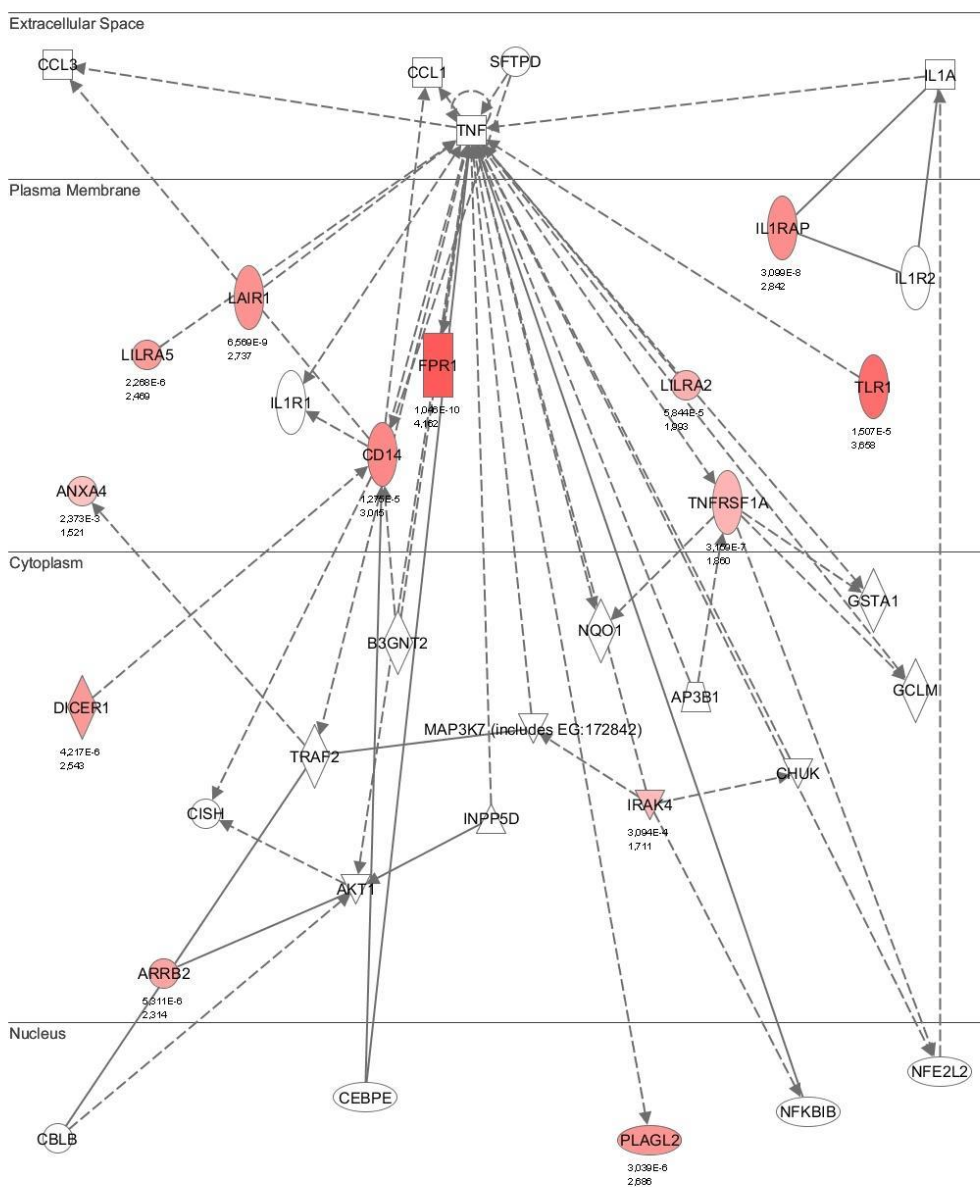

7



1 **Figure S7 legend**

2 Figure S7 displays network 3 from Table 4. The color red indicates that the gene has  
3 been up-regulated by IL-10, and the tone of the color indicates the extent to which the  
4 gene has been up-regulated. Ingenuity Pathway Analysis has located the genes to the  
5 nucleus, cytoplasm, plasma membrane and extracellular space. Solid lines imply direct  
6 relationships between the proteins encoded by the genes, while dashed lines represent  
7 indirect relationships.

8

9 **Figure S8: Heatmap of genes synergistically up-regulated by *N. meningitidis* and**

10 **IL-10.**

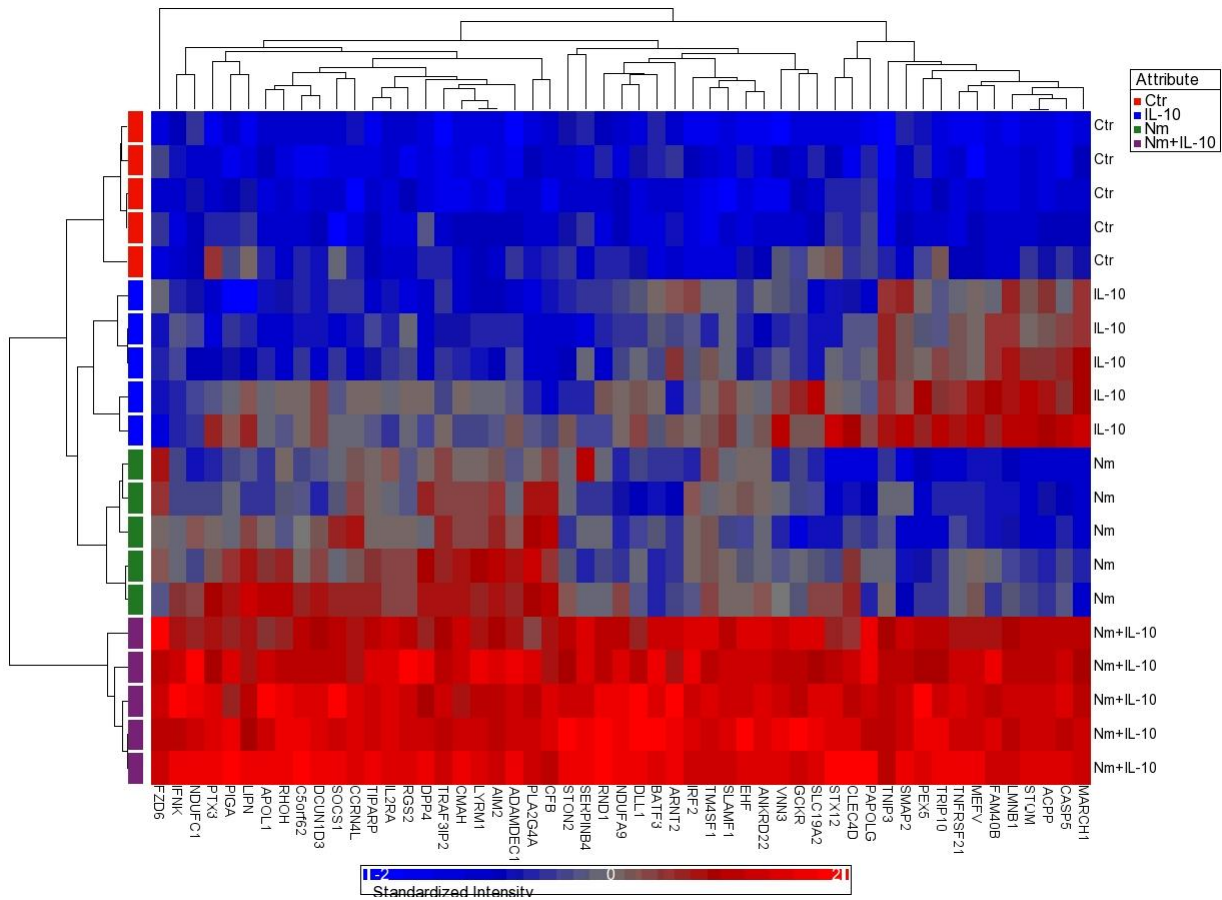

11

12

1 **Figure S8 legend**

2 Heatmap displaying genes synergistically up-regulated by *N. meningitidis* in combination  
3 with IL-10. The heatmap displays the expression of genes in unstimulated monocytes  
4 (Ctr) and monocytes stimulated by IL-10 (IL-10), *N. meningitidis* (Nm) and *N.*  
5 *meningitidis* in combination with IL-10 (Nm + IL-10). The signal intensity for each gene  
6 is compared to the average intensity detected for the gene over the 20 microarrays.  
7 Grey color indicates that the signal intensity for the gene in the array is close to this  
8 average signal intensity level. The color red indicates up-regulation and signal intensity  
9 above the average level, while blue indicates down-regulation and signal intensity below  
10 the average level.

11

12 **Figure S9: Network 1 generated from genes synergistically up-regulated by *N.***  
13 ***meningitidis* and IL-10.**



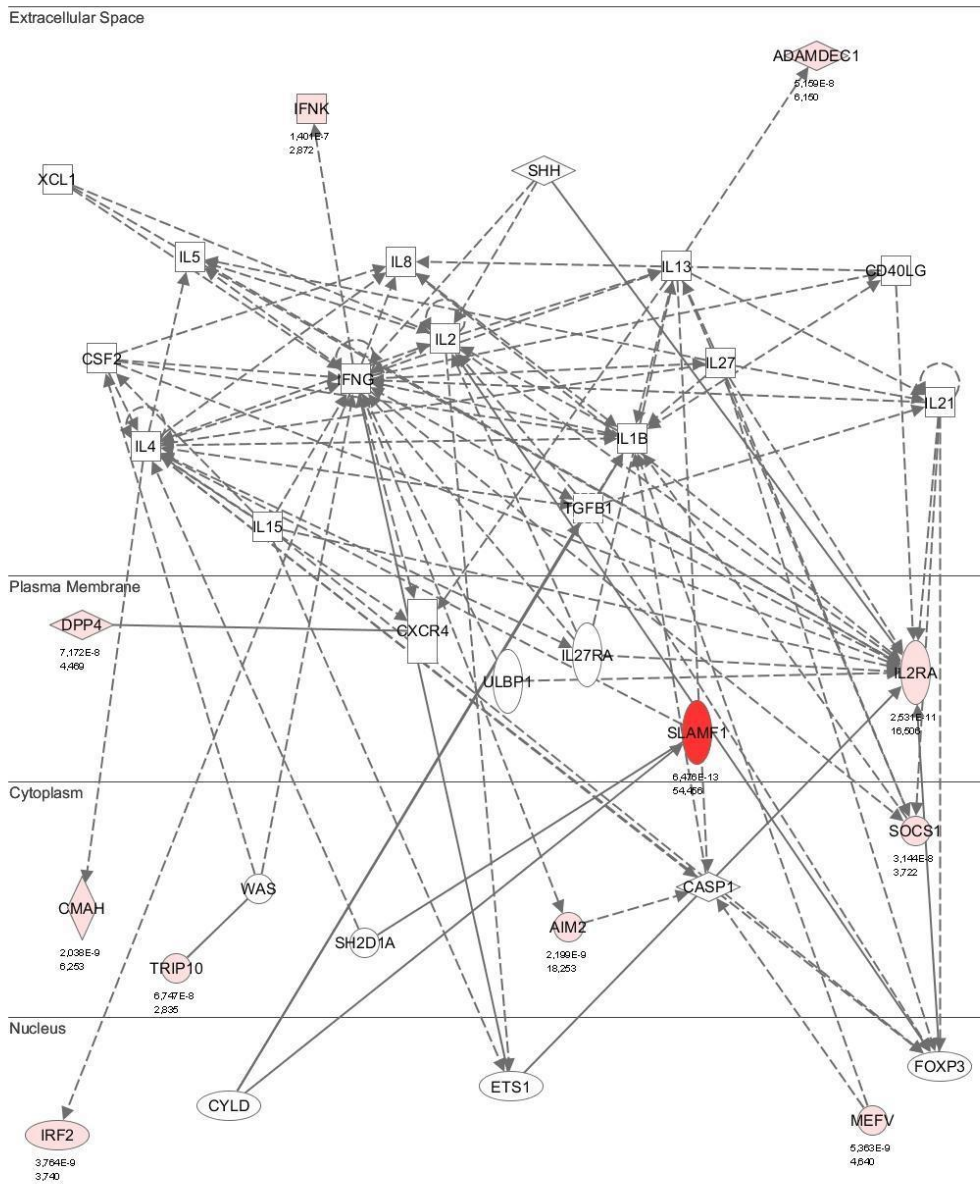

1 © 2000-2012 Ingenuity Systems, Inc. All rights reserved.

2 **Figure S9 legend**

3 Figure S9 displays network 1 from Table 5. The color red indicates that the gene has  
 4 been synergistically up-regulated by *N. meningitidis* and IL-10, and the tone of the color  
 5 indicates the extent to which the gene has been up-regulated. Ingenuity Pathway  
 6 Analysis has located the genes to the nucleus, cytoplasm, plasma membrane and

- 1 extracellular space. Solid lines imply direct relationships between the proteins encoded
- 2 by the genes, while dashed lines represent indirect relationships.
